# Supplementary material for: PLAUR facilitates the progression of clear cell renal cell carcinoma by activating the PI3K/AKT/mTOR signaling pathway
Source: PeerJ journal article supplement (doi:10.7717/peerj.17555), 2024-06-27
Supplement: MIQE_checklist.xls [file MIQE_checklist.xls]

## Sheet: Sheet1
ITEM TO CHECK	IMPORTANCE	CHECKLIST
EXPERIMENTAL DESIGN
Definition of experimental and control groups	E	line 172-173
Number within each group	E	line 199-200
Assay carried out by core lab or investigator's lab?	D	line 172
Acknowledgement of authors' contributions	D	No applicable
SAMPLE
Description	E	line 172-174
Volume/mass of sample processed	D	line 172-174
Microdissection or macrodissection	E	line 172-174
Processing procedure	E	line 172-173
If frozen - how and how quickly?	E	line 172-173
If fixed - with what, how quickly?	E	line 172-173
Sample storage conditions and duration (especially for FFPE samples)	E	line 172
NUCLEIC ACID EXTRACTION
Procedure and/or instrumentation	E	line 175
Name of kit and details of any modifications	E	line 174-176
Source of additional reagents used	D	line 175
Details of DNase or RNAse treatment	E	line 176-178
Contamination assessment (DNA or RNA)	E	line 176
Nucleic acid quantification	E	line 174-176
Instrument and method	E	line 174-176
Purity (A260/A280)	D	line 174-176
Yield	D	line 174-176
RNA integrity method/instrument	E	line 174-176
RIN/RQI or Cq of 3' and 5' transcripts	E	line 191
Electrophoresis traces	D	No applicable
Inhibition testing (Cq dilutions, spike or other)	E	line 194-196
REVERSE TRANSCRIPTION
Complete reaction conditions	E	line 179-181
Amount of RNA and reaction volume	E	line 178-179
Priming oligonucleotide (if using GSP) and concentration	E	line 178
Reverse transcriptase and concentration	E	line 179-181
Temperature and time	E	line 179-181
Manufacturer of reagents and catalogue numbers	D	line 177
Cqs with and without RT	D*	No applicable
Storage conditions of cDNA	D	line 181
qPCR TARGET INFORMATION
If multiplex, efficiency and LOD of each assay.	E	line 194-195
Sequence accession number	E	line 191
Location of amplicon	D	No applicable
Amplicon length	E	line 192
In silico specificity screen (BLAST, etc)	E	No applicable
Pseudogenes, retropseudogenes or other homologs?	D	No applicable
Sequence alignment	D	No applicable
Secondary structure analysis of amplicon	D	No applicable
Location of each primer by exon or intron (if applicable)	E	No applicable
What splice variants are targeted?	E	No applicable
qPCR OLIGONUCLEOTIDES
Primer sequences	E	line 191
RTPrimerDB Identification Number	D	No applicable
Probe sequences	D**	No applicable
Location and identity of any modifications	E	No applicable
Manufacturer of oligonucleotides	D	No applicable
Purification method	D	No applicable
qPCR PROTOCOL
Complete reaction conditions	E	line 191-190
Reaction volume and amount of cDNA/DNA	E	line 184
Primer, (probe), Mg++ and dNTP concentrations	E	line 184
Polymerase identity and concentration	E	line 190-193
Buffer/kit identity and manufacturer	E	line 190-193
Exact chemical constitution of the buffer	D	No applicable
Additives (SYBR Green I, DMSO, etc.)	E	line 183
Manufacturer of plates/tubes and catalog number	D	No applicable
Complete thermocycling parameters	E	line 185-189
Reaction setup (manual/robotic)	D	line 185-189
Manufacturer of qPCR instrument	E	line 181
qPCR VALIDATION
Evidence of optimisation (from gradients)	D	No applicable
Specificity (gel, sequence, melt, or digest)	E	line 191-190
For SYBR Green I, Cq of the NTC	E	line 183
Standard curves with slope and y-intercept	E	line 194-195
PCR efficiency calculated from slope	E	line 194-195
Confidence interval for PCR efficiency or standard error	D	line 194-195
r2 of standard curve	E	line 194-195
Linear dynamic range	E	line 194-196
Cq variation at lower limit	E	line 194-196
Confidence intervals throughout range	D	line 194-196
Evidence for limit of detection	E	line 194-196
If multiplex, efficiency and LOD of each assay.	E	line 194-196
DATA ANALYSIS
qPCR analysis program (source, version)	E	line 246
Cq method determination	E	line 190-194
Outlier identification and disposition	E	line 190-194
Results of NTCs	E	line 190-194
Justification of number and choice of reference genes	E	line 190-194
Description of normalisation method	E	line 190-194
Number and concordance of biological replicates	D	line 198-199
Number and stage (RT or qPCR) of technical replicates	E	line 198-199
Repeatability (intra-assay variation)	E	line 198-199
Reproducibility (inter-assay variation, %CV)	D	No applicable
Power analysis	D	No applicable
Statistical methods for result significance	E	line 246
Software (source, version)	E	line 246
Cq or raw data submission using RDML	D	No applicable
Table 1. MIQE checklist for authors, reviewers and editors. All essential information (E) must be submitted with the manuscript. Desirable
information (D) should be submitted if available. If using primers obtained from RTPrimerDB, information on qPCR target, oligonucleotides,
protocols and validation is available from that source.
*: Assessing the absence of DNA using a no RT assay is essential when first extracting RNA. Once the sample has been validated as
RDNA-free, inclusion of a no-RT control is desirable, but no longer essential.
**: Disclosure of the probe sequence is highly desirable and strongly encouraged. However, since not all commercial pre-designed assay
vendors provide this information, it cannot be an essential requirement. Use of such assays is advised against.
