# Supplementary material for: PLAUR facilitates the progression of clear cell renal cell carcinoma by activating the PI3K/AKT/mTOR signaling pathway
Source: PeerJ journal article supplement (doi:10.7717/peerj.17555), 2024-06-27
Supplement: RawDataCCK8.xlsx [file RawDataCCK8.xlsx]

## Sheet: Sheet1
Figure 6C			day	1	2	3	4	5	6	AVE	SD
	786-O	si NC	1	0.921	1.053	0.924	1.066	1.066	0.929	0.993167	0.0686766
			2	1.537	1.401	1.727	1.607	1.436	1.486	1.53233	0.109672
			3	3.146	2.077	2.113	2.629	3.423	2.051	2.57317	0.545293
			4	4.072	2.911	3.595	3.106	4.246	3.863	3.63217	0.4868
		siPALUR1	1	0.78	0.806	0.877	0.813	0.702	0.894	0.812	0.0633903
			2	0.991	0.904	1.296	1	0.833	0.949	0.9955	0.145649
			3	2.035	1.416	1.353	1.965	1.928	1.946	1.77383	0.277881
			4	1.961	2.132	2.122	2.574	2.435	2.608	2.30533	0.245908
		siPLAUR3	1	0.838	0.889	0.893	0.875	0.887	0.816	0.866333	0.0290498
			2	1.062	1.066	1.013	1.033	1.093	0.926	1.03217	0.0538127
			3	1.903	1.944	1.802	2.126	1.926	1.862	1.92717	0.100264
			4	2.067	2.791	2.604	2.996	2.866	2.267	2.5985	0.33142
			day	1	2	3	4	5	6	AVE	SD
	ACHN	si NC	1	0.429	0.525	0.595	0.418	0.601	0.519	0.5145	0.0715489
			2	1.417	0.996	0.998	1.485	0.996	0.986	1.14633	0.216358
			3	2.217	2.864	2.754	2.537	2.508	2.487	2.56117	0.206662
			4	2.889	3.71	3.522	3.578	3.469	3.476	3.44067	0.259616
		siPALUR1	1	0.544	0.388	0.433	0.453	0.465	0.501	0.464	0.0493761
			2	0.703	0.732	0.714	0.738	0.714	0.754	0.725833	0.017228
			3	1.379	1.455	1.321	1.386	1.536	1.33	1.40117	0.0744881
			4	1.842	2.329	1.958	2.321	2.061	1.74	2.04183	0.223171
		siPLAUR3	1	0.524	0.461	0.467	0.481	0.47	0.481	0.480667	0.0206774
			2	0.724	0.69	0.744	0.752	0.709	0.773	0.732	0.0276345
			3	1.642	1.611	1.652	1.59	1.513	1.523	1.5885	0.0538416
			4	2.277	2.187	2.454	2.319	2.461	2.306	2.334	0.0969502
			day	1	2	3	4	5	AVE	SD
Figure 8B		si NC	1	0.753	0.751	0.661	0.681	0.727	0.7146	0.0372966
			2	0.861	0.87	0.838	0.846	0.841	0.8512	0.0122866
			3	1.186	1.252	1.17	1.169	1.257	1.2068	0.0394431
			4	1.593	1.541	1.669	1.596	1.631	1.606	0.0426333
		siPALUR	1	0.78	0.806	0.877	0.813	0.702	0.7956	0.0566413
			2	0.728	0.833	0.765	0.669	0.849	0.7688	0.0666225
			3	0.969	0.903	0.914	0.968	0.847	0.9202	0.0455166
			4	1.226	1.248	1.261	1.059	1.611	1.281	0.180387
		SC79	1	0.745	0.75	0.737	0.724	0.747	0.7406	0.00935094
			2	0.97	0.969	0.941	0.916	0.95	0.9492	0.019974
			3	1.707	1.7	1.686	1.647	1.685	1.685	0.0207557
			4	2.354	2.407	2.222	2.247	2.112	2.2684	0.103546
		siPLAUR+SC79	1	0.724	0.771	0.741	0.746	0.749	0.7462	0.0151182
			2	0.842	0.888	0.852	0.893	0.857	0.8664	0.0203234
			3	1.352	1.249	1.328	1.291	1.17	1.278	0.0642651
			4	1.898	1.525	2.041	2.009	1.968	1.8882	0.187786
