# Supplementary material for: PLAUR facilitates the progression of clear cell renal cell carcinoma by activating the PI3K/AKT/mTOR signaling pathway
Source: PeerJ journal article supplement (doi:10.7717/peerj.17555), 2024-06-27
Supplement: RawDataFlowCytometry.xlsx [file RawDataFlowCytometry.xlsx]

## Sheet: Sheet1
				1	2	3	AVE	SD
Figure 7A	apoptosis	si NC	786-O	4.08	5.12	3.95	4.38333	0.523599
			ACHN	4.94	5.21	4.38	4.84333	0.345672
				1	2	3	AVE	SD
		si PLAUR1	786-O	10.6	14.2	9.8	11.5333	1.91369
			ACHN	17.1	19.5	15.6	17.4	1.60624
				1	2	3	AVE	SD
		si PLAUR3	786-O	11	12.6	10.1	11.2333	1.03387
			ACHN	18.2	19.4	16.3	17.9667	1.27628
Figure 7B					1	2	3	AVE	SD					1	2	3	AVE	SD
	cell cycle	786-O	S	si NC	26.33	24.56	27.62	26.17	1.25435		ACHN	S	si NC	26.43	25.12	27.88	26.4767	1.12725
				si PLAUR1	29.26	27.56	30.21	29.01	1.09621				si PLAUR1	29.65	27.56	30.21	29.14	1.14038
				si PLAUR2	30.42	28.32	31.56	30.1	1.34194				si PLAUR2	29.68	28.32	31.56	29.8533	1.32839
					1	2	3	AVE	SD					1	2	3	AVE	SD
			G2	si NC	11.21	9.35	13.56	11.3733	1.7226			G2	si NC	11.3	8.65	12.74	10.8967	1.69392
				si PLAUR1	22.52	25.23	20.21	22.6533	2.05157				si PLAUR1	22.36	25.23	20.21	22.6	2.05642
				si PLAUR2	21.5	20.33	23.68	21.8367	1.3882				si PLAUR2	21.86	20.33	23.68	21.9567	1.36934
					1	2	3	AVE	SD					1	2	3	AVE	SD
			G1	si NC	62.46	66.09	58.82	62.4567	2.96797			G1	si NC	62.46	66.23	59.38	62.69	2.80123
				si PLAUR1	48.22	47.21	49.58	48.3367	0.971059				si PLAUR1	47.98	47.21	49.58	48.2567	0.987128
				si PLAUR2	48.08	51.35	44.76	48.0633	2.69038				si PLAUR2	48.46	51.35	44.76	48.19	2.69712
