# Supplementary material for: PLAUR facilitates the progression of clear cell renal cell carcinoma by activating the PI3K/AKT/mTOR signaling pathway
Source: PeerJ journal article supplement (doi:10.7717/peerj.17555), 2024-06-27
Supplement: RawDataPLAUR.xlsx [file RawDataPLAUR.xlsx]

## Sheet: Sheet1
Figure5A	NO.	Para-Carcinona	ccRCC
	1	0.318834	0.378715
	2	0.432612	0.362438
	3	0.255078	0.292311
	4	0.256127	0.430343
	5	0.313913	0.400578
	6	0.235822	0.386152
	7	0.234113	0.274054
	8	0.23518	0.504603
	9	0.25061	0.258963
	10	0.209954	0.285457
	11	0.237082	0.396445
	12	0.273921	0.33413
	13	0.242868	0.261658
	14	0.276861	0.364309
	15	0.288365	0.200089
	16	0.233524	0.26318
	17	0.247557	0.26318
	18	0.242343	0.346698
	19	0.256149	0.256055
	20	0.23194	0.288982
	AVE	0.263643	0.327417
	SD	0.0471548	0.0731702
