# Supplementary material for: PLAUR facilitates the progression of clear cell renal cell carcinoma by activating the PI3K/AKT/mTOR signaling pathway
Source: PeerJ journal article supplement (doi:10.7717/peerj.17555), 2024-06-27
Supplement: RawDataqRTPCR.xlsx [file RawDataqRTPCR.xlsx]

## Sheet: Sheet1
Figure 5B			Para-carcinoma						ccRCC
		NO.	1	2	3	AVE	SD	NO.	1	2	3	AVE	SD
		1	1.21034	1.13715	1.31532	1.22094	0.0731252	1	1.82608	1.7885	1.87742	1.83067	0.0364453
		2	0.851896	0.846012	0.869797	0.855902	0.0101146	2	2.72341	2.68592	2.68592	2.69842	0.0176749
		3	1.04639	1.17725	1.21034	1.14466	0.0707903	3	1.88611	1.99366	1.99366	1.95781	0.050696
		4	0.766	0.820979	0.838229	0.808403	0.0307991	4	3.0996	3.20891	3.16473	3.15775	0.0448969
		5	0.936543	0.879903	0.949616	0.922021	0.0302561	5	1.02722	1.29123	1.37435	1.23094	0.147989
		6	0.934381	0.877873	0.915152	0.909135	0.0234587	6	0.943057	0.917269	0.943057	0.934461	0.0121566
		7	1.13452	1.12668	1.14241	1.13454	0.00642091	7	1.50095	1.81347	1.35543	1.55662	0.191091
		8	1.09082	1.08329	1.10605	1.09339	0.00946785	8	2.05445	1.97076	2.11221	2.0458	0.0580685
		9	1.32485	1.27088	1.26211	1.28595	0.0277429	9	1.70429	1.56826	1.62357	1.63204	0.0558533
		10	0.752189	0.716564	0.721548	0.7301	0.0157511	10	1.72808	1.65768	1.54667	1.64414	0.0746743
		11	1.20233	1.38111	0.949891	1.17778	0.1769	11	1.7401	1.52538	1.64623	1.63723	0.0878887
		12	1.19403	1.19403	1.22759	1.20521	0.0158244	12	1.79315	1.70823	1.75625	1.75254	0.0347704
		13	0.629597	0.60395	0.61238	0.615309	0.0106732	13	1.38751	1.29459	1.31267	1.33159	0.0402245
		14	0.648794	0.644313	0.635442	0.64285	0.00554822	14	1.60863	1.72409	1.71218	1.68163	0.0518484
		15	1.09873	1.11406	1.14539	1.11939	0.0194171	15	1.33715	1.31875	1.32792	1.32794	0.00751546
		16	1.21034	1.13715	1.31532	1.22094	0.0731252	16	1.82608	1.7885	1.87742	1.83067	0.0364453
		17	0.851896	0.846012	0.869797	0.855902	0.0101146	17	2.72341	2.68592	2.68592	2.69842	0.0176749
		18	1.04639	1.17725	1.21034	1.14466	0.0707903	18	1.88611	1.99366	1.99366	1.95781	0.050696
		19	0.766	0.820979	0.838229	0.808403	0.0307991	19	3.0996	3.20891	3.16473	3.15775	0.0448969
		20	0.936543	0.879903	0.949616	0.922021	0.0302561	20	1.02722	1.29123	1.37435	1.23094	0.147989
Figure 5C	Position	Sample Name	Gene Name	Cq	Cq Mean
	A1	HEK293	PLAUR	27.87	27.81
	B1	HEK293	PLAUR	27.82	27.81
	C1	HEK293	PLAUR	27.74	27.81
	A2	Caki-1	PLAUR	26.99	26.93
	B2	Caki-1	PLAUR	26.92	26.93
	C2	Caki-1	PLAUR	26.88	26.93
	A3	ACHN	PLAUR	26.72	26.62
	B3	ACHN	PLAUR	26.58	26.62	PLAUR		1	2	3
	C3	ACHN	PLAUR	26.57	26.62		HEK293	0.959264	0.993092	1.04972
	A4	786-O	PLAUR	27.06	27.12		Caki-1	1.37237	1.4406	1.4811
	B4	786-O	PLAUR	27.17	27.12		ACHN	1.77769	1.95884	1.97247
	C4	786-O	PLAUR	27.12	27.12		786-O	1.77358	1.64338	1.70133
	A5	769-P	PLAUR	26.87	26.81		769-P	1.76949	1.90968	1.87038
	B5	769-P	PLAUR	26.76	26.81		AVE	1.53048	1.58912	1.615
	C5	769-P	PLAUR	26.79	26.81		SD	0.325153	0.352053	0.328003
	D1	HEK293	GAPDH	13.63	13.74
	E1	HEK293	GAPDH	13.62	13.74
	F1	HEK293	GAPDH	13.98	13.74
	D2	Caki-1	GAPDH	13.37	13.38
	E2	Caki-1	GAPDH	13.4	13.38
	F2	Caki-1	GAPDH	13.37	13.38
	D3	ACHN	GAPDH	13.59	13.48
	E3	ACHN	GAPDH	13.54	13.48
	F3	ACHN	GAPDH	13.32	13.48
	D4	786-O	GAPDH	13.87	13.82
	E4	786-O	GAPDH	13.8	13.82
	F4	786-O	GAPDH	13.79	13.82
	D5	769-P	GAPDH	13.61	13.63
	E5	769-P	GAPDH	13.68	13.63
	F5	769-P	GAPDH	13.59	13.63
Figure 6A	786-O	Position	Sample Name	Gene Name	Cq	Cq Mean	Cq Error
		A1	si NC	1 siPLAUR	20.12	20.27	0.31
		B1	si NC	1 siPLAUR	20.06	20.27	0.31
		C1	si NC	1 siPLAUR	20.62	20.27	0.31
		A2	siPLAUR-1	1 siPLAUR	21.98	21.97	0.1
		B2	siPLAUR-1	1 siPLAUR	21.87	21.97	0.1
		C2	siPLAUR-1	1 siPLAUR	22.06	21.97	0.1
		A3	siPLAUR-2	1 siPLAUR	21.42	21.59	0.26				1	2	3	AVE	SD
		B3	siPLAUR-2	1 siPLAUR	21.45	21.59	0.26		786-O	si NC	1.10701	1.15402	0.782773	1.0146	0.165046
		C3	siPLAUR-2	1 siPLAUR	21.89	21.59	0.26			siPLAUR-1	0.264866	0.285851	0.250578	0.267098	0.0144861
		A4	siPLAUR-3	1 siPLAUR	21.87	21.76	0.22			siPLAUR-2	0.501157	0.490843	0.361817	0.451272	0.0633942
		B4	siPLAUR-3	1 siPLAUR	21.9	21.76	0.22			siPLAUR-3	0.277392	0.271684	0.358489	0.302522	0.0396433
		C4	siPLAUR-3	1 siPLAUR	21.5	21.76	0.22				1	2	3	AVE	SD
		F1	si NC	GAPDH-1	13.01	12.96	0.06		ACHN	si NC	1.05458	1.04729	0.905425	1.00243	0.0686593
		G1	si NC	GAPDH-1	12.98	12.96	0.06			siPLAUR-1	0.264866	0.268563	0.240371	0.257933	0.0125099
		H1	si NC	GAPDH-1	12.9	12.96	0.06			siPLAUR-2	0.323088	0.301452	0.406126	0.343555	0.0451173
		F2	siPLAUR-1	GAPDH-1	12.9	12.76	0.12			siPLAUR-3	0.522439	0.252321	0.126161	0.300307	0.1653
		G2	siPLAUR-1	GAPDH-1	12.7	12.76	0.12
		H2	siPLAUR-1	GAPDH-1	12.68	12.76	0.12
		F3	siPLAUR-2	GAPDH-1	13.14	13.12	0.05
		G3	siPLAUR-2	GAPDH-1	13.16	13.12	0.05
		H3	siPLAUR-2	GAPDH-1	13.06	13.12	0.05
		F4	siPLAUR-3	GAPDH-1	13.03	12.72	0.27
		G4	siPLAUR-3	GAPDH-1	12.58	12.72	0.27
		H4	siPLAUR-3	GAPDH-1	12.54	12.72	0.27
	ACHN	Position	Sample Name	Gene Name	Cq	Cq Mean	Cq Error
		A5	si NC	2 siPLAUR	19.94	20.02	0.12
		B5	si NC	2 siPLAUR	19.95	20.02	0.12
		C5	si NC	2 siPLAUR	20.16	20.02	0.12
		A6	siPLAUR-1	2 siPLAUR	21.77	21.81	0.09
		B6	siPLAUR-1	2 siPLAUR	21.75	21.81	0.09
		C6	siPLAUR-1	2 siPLAUR	21.91	21.81	0.09
		A7	siPLAUR-2	2 siPLAUR	21.85	21.41	0.1
		B7	siPLAUR-2	2 siPLAUR	21.95	21.41	0.1
		C7	siPLAUR-2	2 siPLAUR	21.52	21.41	0.1
		A8	siPLAUR-3	2 siPLAUR	20.8	20.72	0.18
		B8	siPLAUR-3	2 siPLAUR	21.85	20.72	0.18
		C8	siPLAUR-3	2 siPLAUR	22.85	20.72	0.18
		F5	si NC	GAPDH-2	13.02	12.92	0.11
		G5	si NC	GAPDH-2	12.92	12.92	0.11
		H5	si NC	GAPDH-2	12.81	12.92	0.11
		F6	siPLAUR-1	GAPDH-2	12.88	12.75	0.11
		G6	siPLAUR-1	GAPDH-2	12.69	12.75	0.11
		H6	siPLAUR-1	GAPDH-2	12.69	12.75	0.11
		F7	siPLAUR-2	GAPDH-2	13.19	13.12	0.07
		G7	siPLAUR-2	GAPDH-2	13.11	13.12	0.07
		H7	siPLAUR-2	GAPDH-2	13.06	13.12	0.07
		F8	siPLAUR-3	GAPDH-2	13.06	12.76	0.26
		G8	siPLAUR-3	GAPDH-2	12.63	12.76	0.26
		H8	siPLAUR-3	GAPDH-2	12.6	12.76	0.26
