# Supplementary material for: PLAUR facilitates the progression of clear cell renal cell carcinoma by activating the PI3K/AKT/mTOR signaling pathway
Source: PeerJ journal article supplement (doi:10.7717/peerj.17555), 2024-06-27
Supplement: RawDataTranswell.xlsx [file RawDataTranswell.xlsx]

## Sheet: Sheet1
		migration								invasion
Figure 6D	786-O	Slice	Count	Total Area	Average Size	%Area	Mean	IntDen		Slice	Count	Total Area	Average Size	%Area	Mean	IntDen
		NC_1	2777	3558812	1281.53	29.657	127.585	151705		NC_1	2617	2809462	1073.54	23.412	89.034	75668
		NC_3	2637	3934961	1492.21	32.791	130.385	163048		NC_3	2187	4053726	1853.56	33.781	55.395	70558.6
		siPLAUR1_1	1401	7650308	5460.6	63.753	90.019	296129		siPLAUR1_1	1106	8238558	7448.97	68.655	118.596	572910
		siPLAUR1_3	1157	9402977	8127.03	78.358	98.959	477348		siPLAUR1_3	1192	9274548	7780.66	77.288	104.334	542733
		siPLAUR2_1	1339	7106277	5307.15	59.219	64.609	187325		siPLAUR2_1	1324	8429485	6366.68	70.246	92.747	358438
		siPLAUR2_3	1079	8716046	8077.89	72.634	101.584	527410		siPLAUR2_3	1367	7272517	5320.06	60.604	86.943	312855
		siPLAUR3_1	1757	7650280	4354.17	63.752	86.372	238049		siPLAUR3_1	1559	8536859	5475.86	71.14	105.744	387815
		siPLAUR3_3	1516	8765792	5782.19	73.048	81.648	289876		siPLAUR3_3	1659	8812980	5312.22	73.442	93.229	318950
		migration								invasion
	ACHN	Slice	Count	Total Area	Average Size	%Area	Mean	IntDen		Slice	Count	Total Area	Average Size	%Area	Mean	IntDen
		NC_1	1257	6598084	5249.07	54.984	75.542	244405		NC_1	1578	7520611	4765.91	62.672	51.094	275738
		NC_3	1415	6464982	4568.89	53.875	69.582	188579		NC_3	1393	5507510	3953.7	45.896	49.145	154702
		siPLAUR1_1	557	10222145	18352.1	85.185	93.888	993879		siPLAUR1_1	584	8879006	15203.8	73.992	67.237	588291
		siPLAUR1_3	291	11204389	38503.1	93.37	135.447	3.54019e+06		siPLAUR1_3	394	9736792	24712.7	81.14	88.477	1.1661e+06
		siPLAUR2_1	823	9378637	11395.7	78.155	91.772	545630		siPLAUR2_1	315	8867336	28150.3	73.894	56.882	438248
		siPLAUR2_3	938	9879111	10532.1	82.326	117.651	693991		siPLAUR2_3	180	10899973	60555.4	90.833	78.246	2.32964e+06
		siPLAUR3_1	566	9995694	17660.2	83.297	88.72	834154		siPLAUR3_1	596	8366578	14037.9	69.721	63.376	419168
		siPLAUR3_3	600	10598882	17664.8	88.324	96.499	872163		siPLAUR3_3	255	10061604	39457.3	83.847	82.612	1.11458e+06
Figure 8C		migration								invasion
		Slice	Count	Total Area	Average Size	%Area	Mean	IntDen		Slice	Count	Total Area	Average Size	%Area	Mean	IntDen
		si NC.tif	1142	6605929	5784.53	55.049	255	1.47505e+06		si NC.tif	817	10103816	12367	84.198	255	3.15358e+06
		si NC.tif	994	8044798	8093.36	67.04	255	2.06381e+06		si NC.tif	784	10215746	13030.3	85.131	255	3.32272e+06
		si NC.tif	1005	8445605	8403.59	70.38	255	2.14291e+06		si NC.tif	826	10034879	12148.8	83.624	255	3.09793e+06
		siPLAUR.tif	668	9454765	14153.8	78.79	255	3.60923e+06		siPLAUR.tif	88	11554189	131298	96.285	255	3.34809e+07
		siPLAUR.tif	415	10572450	25475.8	88.104	255	6.49632e+06		siPLAUR.tif	128	11231705	87747.7	93.598	255	2.23757e+07
		siPLAUR.tif	656	9610076	14649.5	80.084	255	3.73562e+06		siPLAUR.tif	210	10854511	51688.1	90.454	255	1.31805e+07
		SC79.tif	1493	5641906	3778.91	47.016	255	963621		SC79.tif	997	7595433	7618.29	63.295	255	1.94266e+06
		SC79.tif	1501	5322495	3545.97	44.354	255	904221		SC79.tif	1743	6216503	3566.55	51.804	255	909471
		SC79.tif	1420	6221329	4381.22	51.844	255	1.11721e+06		SC79.tif	1119	7126481	6368.62	59.387	255	1.624e+06
		siPLAUR+SC79.tif	999	9184982	9194.18	76.542	255	2.34451e+06		siPLAUR+SC79-1.tif	437	10769747	24644.7	89.748	255	6.28441e+06
		siPLAUR+SC79.tif	909	9801156	10782.4	81.676	255	2.7495e+06		siPLAUR+SC79-1.tif	554	10602815	19138.7	88.357	255	4.88036e+06
		siPLAUR+SC79.tif	1214	8391130	6911.97	69.926	255	1.76255e+06		siPLAUR+SC79.tif	657	10374257	15790.3	86.452	255	4.02654e+06
