# Supplementary material for: PLAUR facilitates the progression of clear cell renal cell carcinoma by activating the PI3K/AKT/mTOR signaling pathway
Source: PeerJ journal article supplement (doi:10.7717/peerj.17555), 2024-06-27
Supplement: RawDataWestern_blot.xlsx [file RawDataWestern_blot.xlsx]

## Sheet: Sheet1
Figure 5D	cell line		1	2	3	AVE	SD
		HEK293	0.525096	0.598804	0.66338	0.59576	0.0564952
		Caki-1	0.728207	0.874821	1.0537	0.885576	0.1331
		ACHN	0.842399	0.840244	1.24338	0.975341	0.189534
		786-O	1.07504	1.06495	1.24576	1.12858	0.0829617
		769-P	0.894864	0.94545	1.08186	0.974058	0.0789749
	normalized		1	2	3	AVE	SD
		HEK293	1	1	1	1	0
		Caki-1	1.38681	1.46095	1.58838	1.47871	0.0832457
		ACHN	1.60428	1.4032	1.87431	1.62726	0.193014
		786-O	2.04732	1.77846	1.8779	1.90123	0.110996
		769-P	1.70419	1.5789	1.63083	1.63797	0.0513993
Figure 6B	786-O	cell line		1	2	3	AVE	SD
			Vector	0.946576	1.25522	0.986566	1.06279	0.137045
			siPLAUR1	0.512611	0.445057	0.663277	0.540315	0.0912162
			siPLAUR2	0.756685	0.716766	0.828625	0.767359	0.0462856
			siPLAUR3	0.555165	0.417059	0.471378	0.481201	0.0568079
		normalized		1	2	3	AVE	SD
			Vector	1	1	1	1	0
			siPLAUR1	0.541542	0.354566	0.672309	0.522805	0.130393
			siPLAUR2	0.799392	0.57103	0.839908	0.736777	0.118362
			siPLAUR3	0.586498	0.33226	0.477797	0.465519	0.104155
	ACHN	cell line		1	2	3	AVE	SD
			Vector	1.01348	0.976652	1.00261	0.99758	0.0154496
			siPLAUR1	0.368506	0.408012	0.347502	0.374673	0.025085
			siPLAUR2	0.289714	0.503191	0.464563	0.419156	0.0928778
			siPLAUR3	0.34875	0.457899	0.436671	0.41444	0.0472515
		normalized		1	2	3	AVE	SD
			Vector	1	1	1	1	0
			siPLAUR1	0.363605	0.417766	0.346598	0.37599	0.0303453
			siPLAUR2	0.285861	0.515221	0.463354	0.421479	0.0982061
			siPLAUR3	0.344111	0.468846	0.435535	0.416164	0.0527326
Figure 7C				1	2	3	AVE	SD
	786-O	si NC	E Cadherin	0.169363	0.394654	0.371354	0.31179	0.10116
			N Cadherin	0.83415	0.830171	0.805519	0.82328	0.0126633
			Vimentin	1.16719	1.06634	1.00067	1.07807	0.0684839
			MMP9	0.666937	1.1184	0.848391	0.87791	0.185488
				1	2	3	AVE	SD
		siPLAUR1	E Cadherin	0.850737	1.02874	0.857887	0.912455	0.0822788
			N Cadherin	0.465861	0.475375	0.572125	0.504454	0.0480083
			Vimentin	0.760352	0.81081	0.844606	0.805256	0.0346203
			MMP9	0.193785	0.1804	0.181759	0.185314	0.00601509
				1	2	3	AVE	SD
		siPLAUR3	E Cadherin	0.784581	0.914714	0.566343	0.755213	0.14373
			N Cadherin	0.566988	0.668313	0.490855	0.575385	0.0726897
			Vimentin	0.916257	0.915535	0.715518	0.849104	0.0944594
			MMP9	0.38454	0.594499	0.505525	0.494855	0.0860469
				1	2	3	AVE	SD
	ACHN	si NC	E Cadherin	0.321925	0.191694	0.270771	0.261463	0.0535725
			N Cadherin	0.71651	0.823218	0.793566	0.777765	0.0449733
			Vimentin	1.01646	0.730788	0.857378	0.868208	0.116874
			MMP9	0.823629	0.845941	1.11703	0.928867	0.133363
				1	2	3	AVE	SD
		siPLAUR1	E Cadherin	0.83963	0.357639	1.10001	0.765761	0.307542
			N Cadherin	0.334128	0.430206	0.298848	0.354394	0.0555082
			Vimentin	0.446649	0.477856	0.582766	0.502424	0.0582216
			MMP9	0.148806	0.140866	0.103514	0.131062	0.0197475
				1	2	3	AVE	SD
		siPLAUR3	E Cadherin	0.486255	0.57659	1.02086	0.694567	0.23365
			N Cadherin	0.377881	0.554807	0.367366	0.433351	0.0859892
			Vimentin	0.507822	0.623385	0.423535	0.518247	0.0819208
			MMP9	0.125322	0.226991	0.230479	0.194264	0.0487702
Figure 8A		si NC	si NC	si NC			siPLAUR	siPLAUR	siPLAUR			SC79	SC79	SC79			siPLAUR+SC79	siPLAUR+SC79	siPLAUR+SC79
		1	2	3	AVE	SD	1	2	3	AVE	SD	1	2	3	AVE	SD	1	2	3	AVE	SD
	PLAUR	1	1	1	1	0	0.701549	0.488511	0.64249	0.61085	0.0898041	0.964444	0.791481	1.10055	0.952157	0.126474	0.460346	0.46719	0.6651	0.530879	0.09495
	PI3K	1	1	1	1	0	0.954875	0.945804	1.01099	0.970557	0.0288297	0.812442	1.029	1.11661	0.986017	0.127842	0.710008	0.782814	0.902741	0.798521	0.0794627
	p-PI3K	1	1	1	1	0	0.528412	0.588464	0.608723	0.5752	0.0341019	1.25746	0.827455	1.08926	1.05806	0.176928	0.719434	0.483892	0.594903	0.59941	0.096212
	AKT	1	1	1	1	0	0.851927	0.878032	1.13526	0.955073	0.127856	0.800181	1.00042	1.26062	1.02041	0.188505	0.656426	0.784467	0.888308	0.7764	0.094837
	p-Akt	1	1	1	1	0	0.255415	0.352678	0.252725	0.286939	0.0464973	1.22407	1.59185	1.90053	1.57215	0.276515	0.931218	1.08699	1.35568	1.12463	0.175317
	mTOR	1	1	1	1	0	0.871872	0.985588	0.944864	0.934108	0.0470432	1.02462	0.873758	0.740355	0.879577	0.116123	0.987382	0.822478	0.774211	0.861357	0.0912657
	p-mTOR	1	1	1	1	0	0.687121	0.702786	0.338666	0.576191	0.168077	1.36238	1.3621	1.5181	1.41419	0.0734759	0.957496	0.888811	1.21323	1.01984	0.139587
	HIF-1α	1	1	1	1	0	0.536399	0.474892	0.462802	0.491365	0.0322245	1.32943	1.61533	2.16048	1.70175	0.344735	0.885422	1.21438	1.36837	1.15606	0.201431
	MMP9	1	1	1	1	0	0.538202	0.52215	0.590698	0.55035	0.0292732	1.66513	1.96976	1.98101	1.87197	0.146331	1.24357	1.15479	1.22027	1.20621	0.0375799
