# Supplementary material for: PLAUR facilitates the progression of clear cell renal cell carcinoma by activating the PI3K/AKT/mTOR signaling pathway
Source: PeerJ journal article supplement (doi:10.7717/peerj.17555), 2024-06-27
Supplement: Supplementary_Table_1.docx [file Supplementary_Table_1.docx]

Supplementary Table 1

| **Antibodies** | **Art.NO.** | **Ratio** | **Manufacturer** | **Antibodies** | **Art.NO.** | **Ratio** | **Manufacturer** |
| --- | --- | --- | --- | --- | --- | --- | --- |
| **PLAUR** | #821140 | 1:1000 | Zenbio | **PI3K** | R22768 | 1:1000 | Zenbio |
| **β- Tubulin** | 10094-1-AP | 1:9000 | Proteintech | **p - PI3K** | 341468 | 1:1000 | Zenbio |
| **GAPDH** | 10494-1-AP | 1:20000 | Proteintech | **AKT** | R23412 | 1:1000 | Zenbio |
| **Vimentin** | R22775 | 1:1000 | Zenbio | **p - AKT** | 310021 | 1:1000 | Zenbio |
| **N-Cadherin** | R380671 | 1:1000 | Zenbio | **mTOR** | 380411 | 1:1000 | Zenbio |
| **E-Cadherin** | 340341 | 1:1000 | Zenbio | **p - mTOR** | 381557 | 1:1000 | Zenbio |
| **MMP9** | 10375-2-AP | 1:3000 | Proteintech | **HIF1-α** | 20960-1-AP | 1:6000 | Proteintech |
