# Supplementary material for: PLAUR facilitates the progression of clear cell renal cell carcinoma by activating the PI3K/AKT/mTOR signaling pathway
Source: PeerJ journal article supplement (doi:10.7717/peerj.17555), 2024-06-27
Supplement: Western_blot.zip [file Western_blot.zip]

**Fig. 5 D**


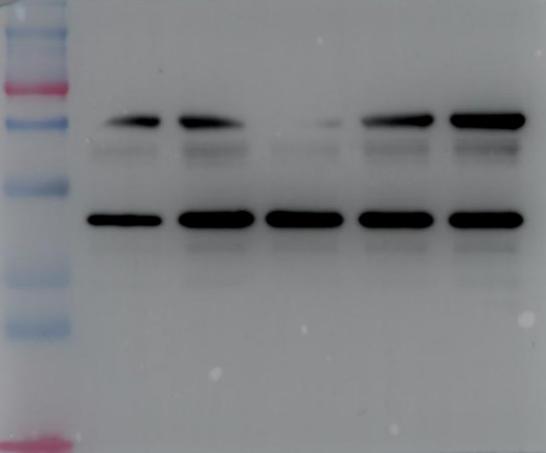

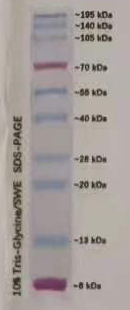


70

55

40

PLAUR 37kDa

28

20


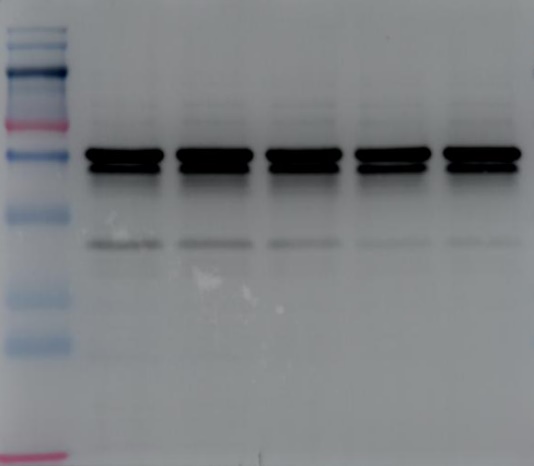


70

55 β-Tubulin 55kDa

40

28

20

10% SDS -PAGE

Group: marker HEK293 Caki-1 ACHN 786-O 769-P Servicebio Marker Ⅶ（8-195kDa)

**Fig. 6B**

SiPLAUR

786-O


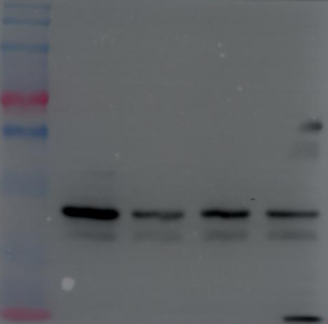


105

70

55

40

PLAUR 37kDa

28

20


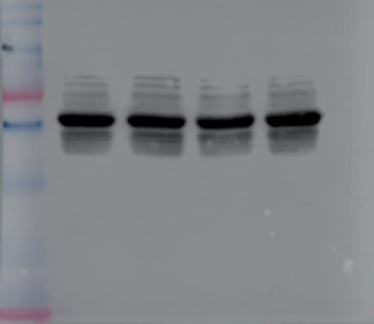


105

70 β-Tubulin 55kDa


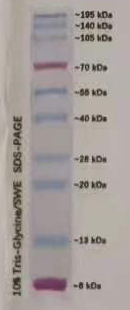
55

40

28

20


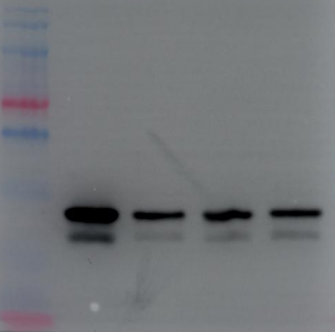
ACHN

105

70

55

40 PLAUR 37kDa

28

20


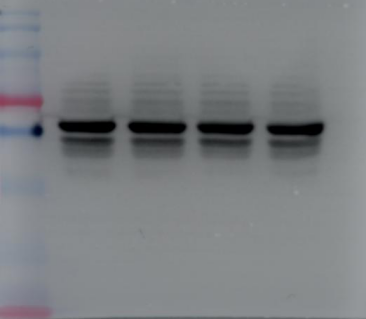


105

70

55 β-Tubulin 55kDa

40

28

20

10% SDS -PAGE

**Group:** marker siNC si PLAUR1 siPLAUR2 siPLAUR3 Servicebio Marker Ⅶ（8-195kDa)

**Fig. 7C**

SiPLAUR


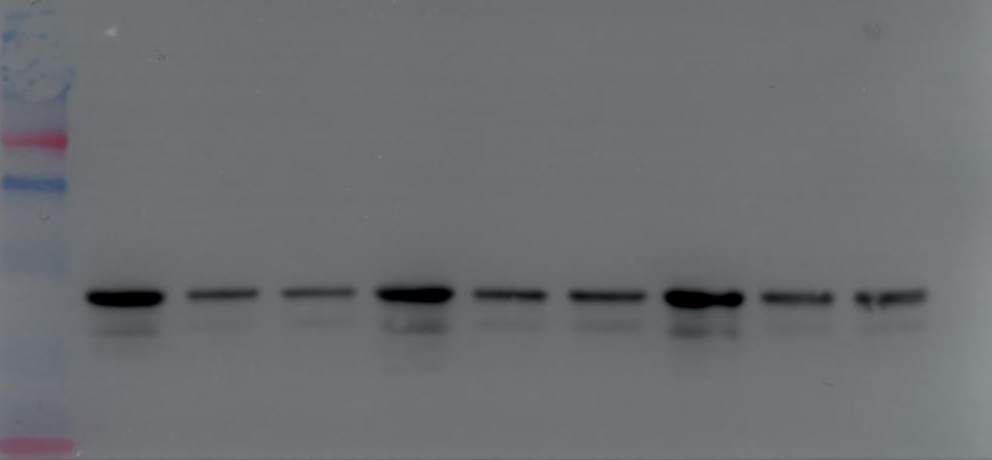
786-O

105

70

55

40 PLAUR 37kDa

28


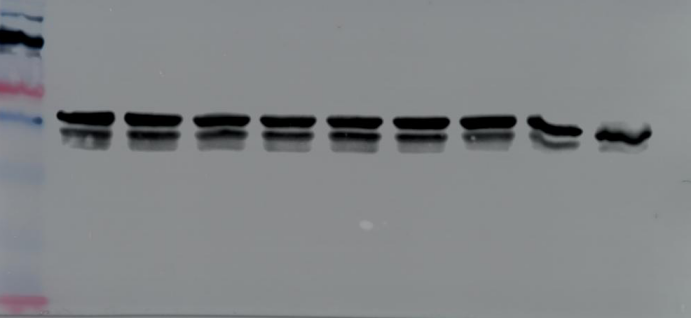


105

70

55 GAPDH 36kDa

40

28


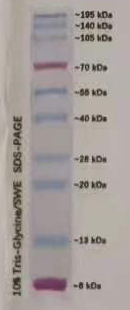


ACHN


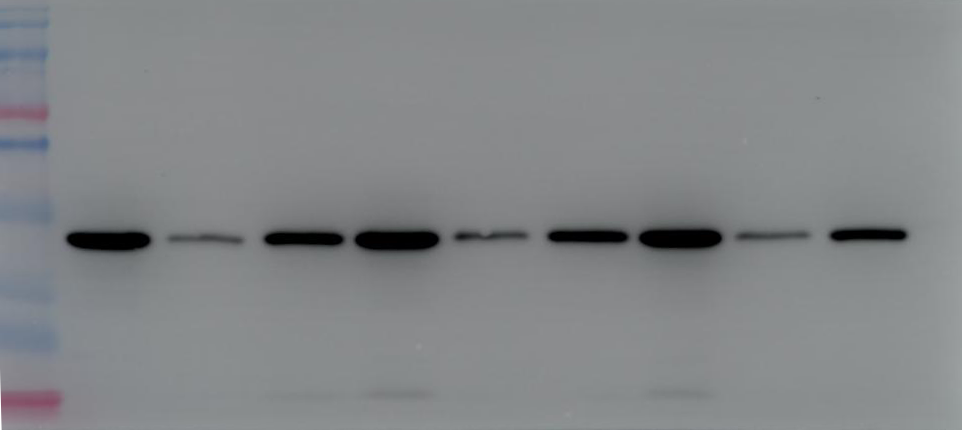


105

70

55

PLAUR 37kDa

40

28

20


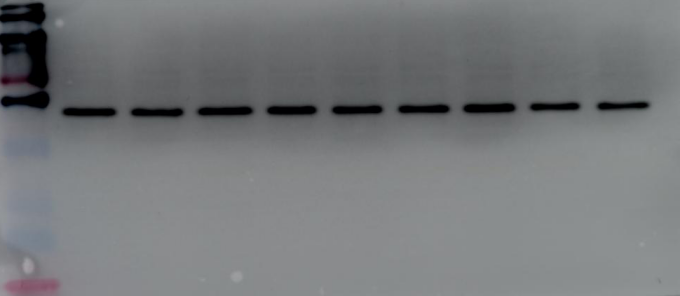


105

70 GAPDH 36kDa

55

40

28

20

10% SDS -PAGE

**Group:** marker siNC si PLAUR1 siPLAUR3 siNC si PLAUR1 siPLAUR3 siNC si PLAUR1 siPLAUR3 Servicebio Marker Ⅶ（8-195kDa)

E Cadherin 786-O


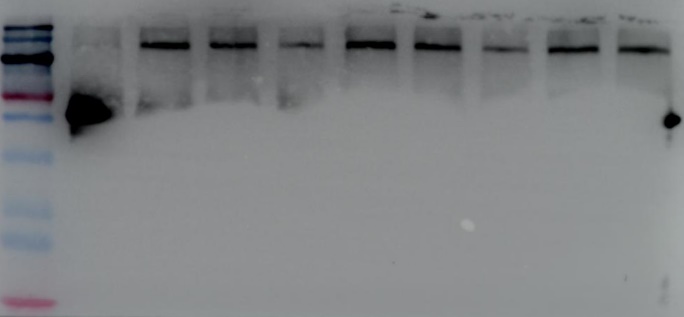

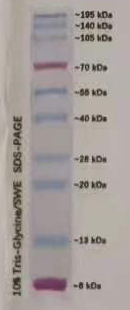


140

105 E Cadherin 120kDa

70

55

40

28

20


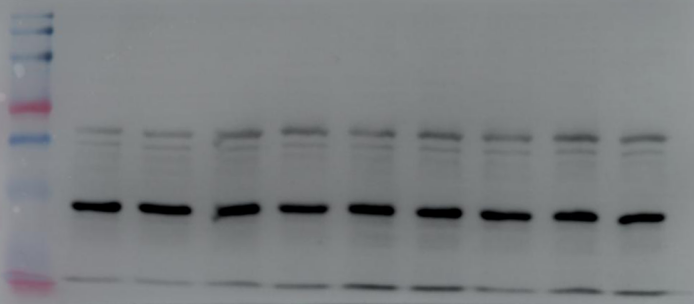


105

70

55

40

28 GAPDH 36kDa

10% SDS -PAGE

Group: marker siNC si PLAUR1 siPLAUR3 siNC si PLAUR1 siPLAUR3 siNC si PLAUR1 siPLAUR3 Servicebio Marker Ⅶ（8-195kDa)


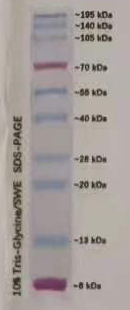
ACHN


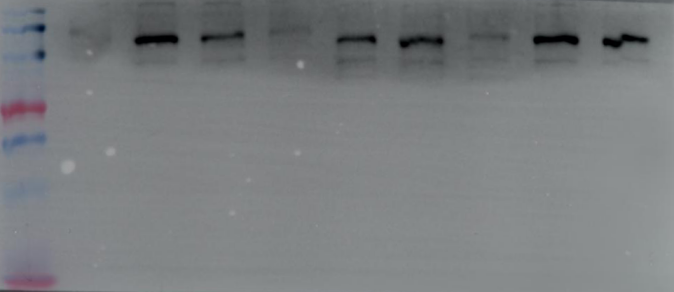


140 E Cadherin 120kDa

105

70

55

40


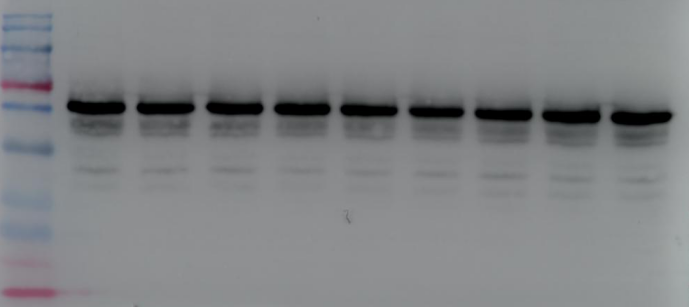
140

105

70 β-Tubulin 55kDa

55

40

10% SDS -PAGE

Group: marker siNC si PLAUR1 siPLAUR3 siNC si PLAUR1 siPLAUR3 siNC si PLAUR1 siPLAUR3 Servicebio Marker Ⅶ（8-195kDa)

N Cadherin

N Cadherin


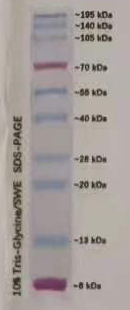

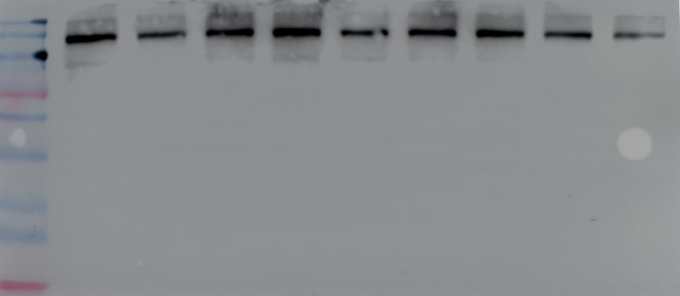
786-O

140 N Cadherin 120kDa

105

70

55

40

28


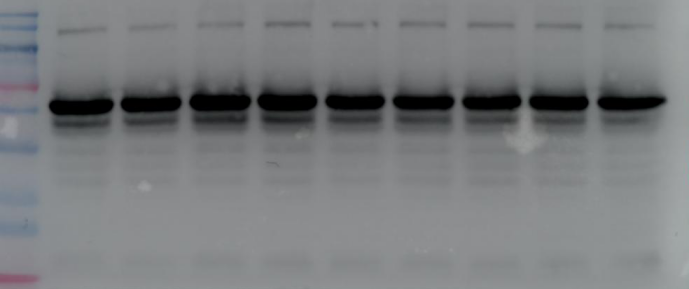


140

105

70

55 β-Tubulin 55kDa

40

28

10% SDS -PAGE

Group: marker siNC si PLAUR1 siPLAUR3 siNC si PLAUR1 siPLAUR3 siNC si PLAUR1 siPLAUR3 Servicebio Marker Ⅶ（8-195kDa)


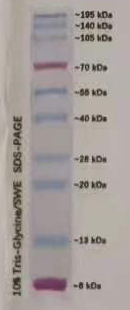
ACHN


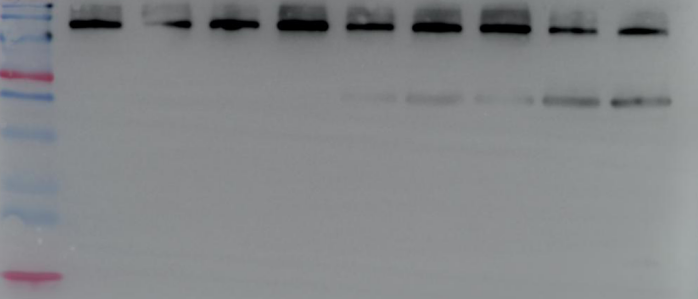
140

105 N Cadherin 120kDa

70

55

40

28


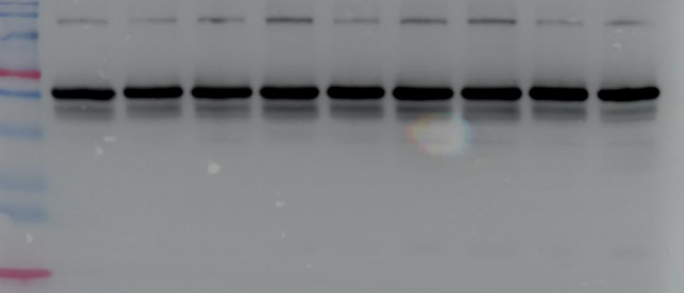
140

105

70

55 β-Tubulin 55kDa

40

28

10% SDS -PAGE

**Group:** marker siNC si PLAUR1 siPLAUR3 siNC si PLAUR1 siPLAUR3 siNC si PLAUR1 siPLAUR3 Servicebio Marker Ⅶ（8-195kDa)

Vimentin

786-O


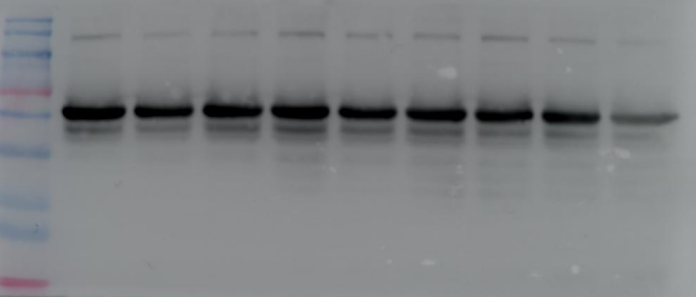


105

70

55 Vimentin 54kDa

40

28

20


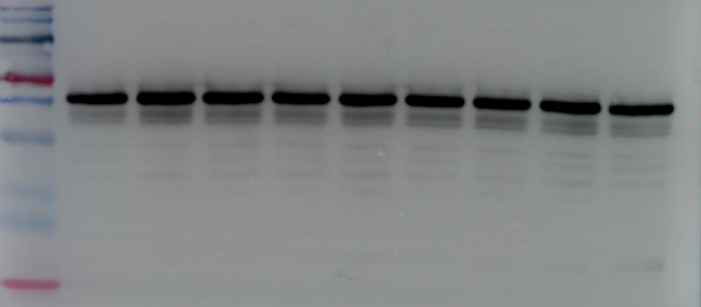


105

70

55 β-Tubulin 55kDa


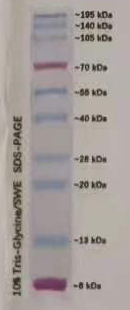
40

28

20

ACHN


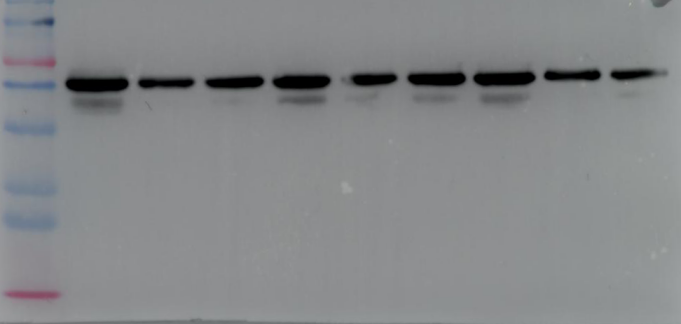
105

70 Vimentin 54kDa

55

40

28

20


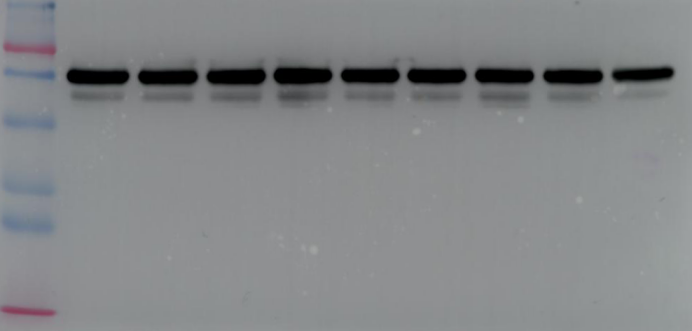
105

70

55 β-Tubulin 55kDa

40

28

20

10% SDS -PAGE

**Group:** marker siNC si PLAUR1 siPLAUR3 siNC si PLAUR1 siPLAUR3 siNC si PLAUR1 siPLAUR3 Servicebio Marker Ⅶ（8-195kDa)

MMP9

786-O


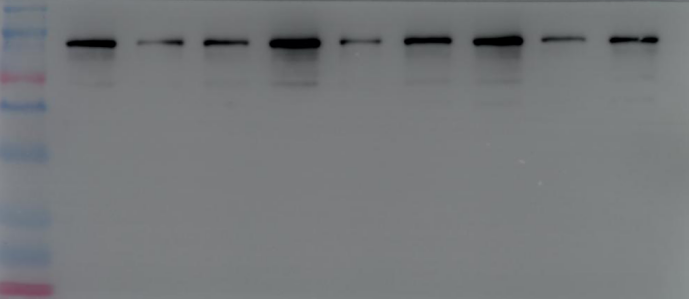


105 MMP9 92kDa

70

55

40

28

20


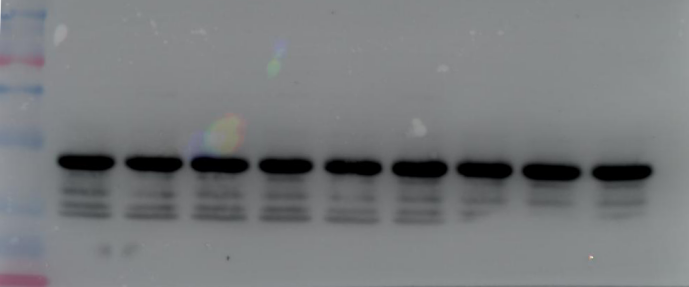
105

70

55

40

GAPDH 36kDa

28

20


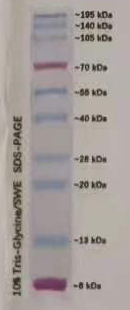


ACHN


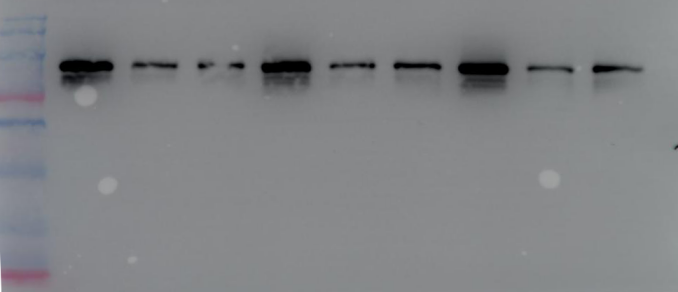


105 MMP9 92kDa

70

55

40

28

20


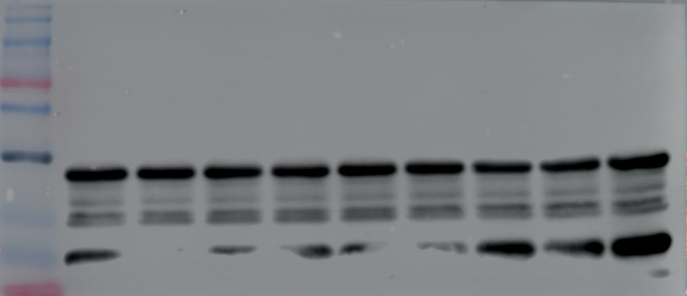


105

70

55

40 GAPDH 36kDa

28

20

10% SDS -PAGE

**Group:** marker siNC si PLAUR1 siPLAUR3 siNC si PLAUR1 siPLAUR3 siNC si PLAUR1 siPLAUR3 Servicebio Marker Ⅶ（8-195kDa)

**Fig. 8A** PI3K-AKT-mTOR-hif-α


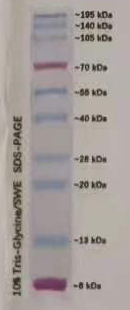
siPLAUR


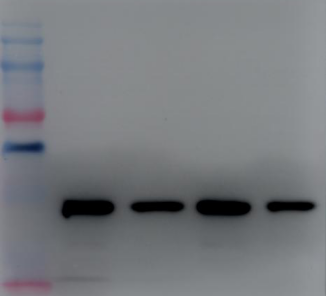


105

70

55

40 PLAUR 37kDa

28


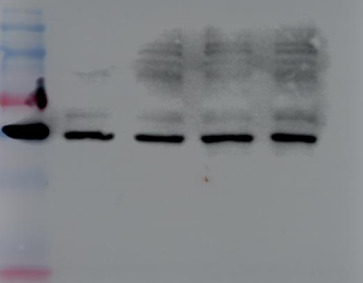


105

70 β-Tubulin

55

40

28

7.5% SDS -PAGE

**Group:** marker siNC si PLAUR SC79 siPLAUR+SC79 Servicebio Marker Ⅶ（8-195kDa)


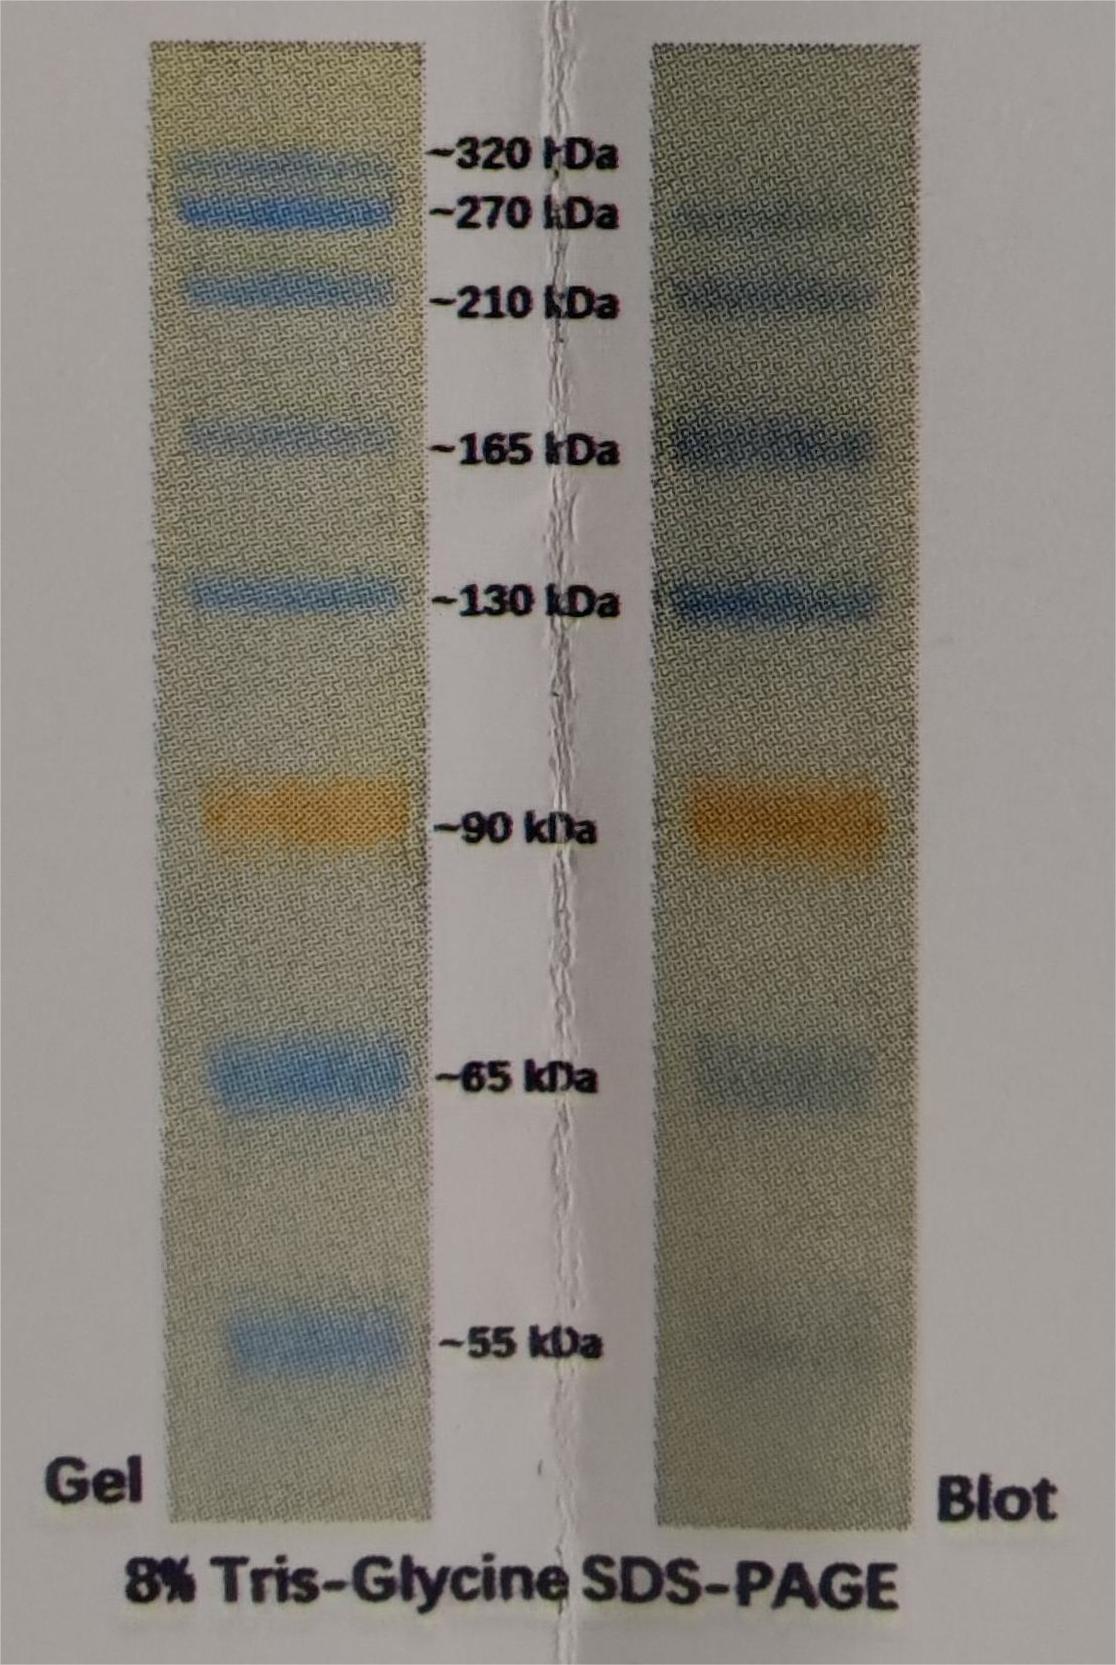
PI3K


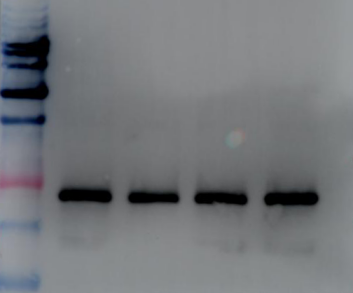


165

130

90 PI3K 85kDa

65

55


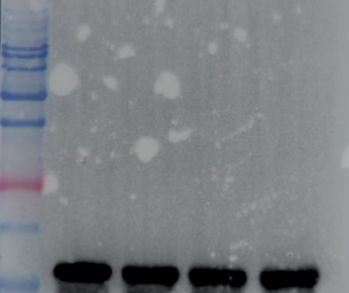


165

130

90

65

55 β-Tubulin 55kDa

7.5% SDS -PAGE

**Group:** marker siNC si PLAUR SC79 siPLAUR+SC79 Servicebio Marker Ⅶ（55-320kDa)

p-PI3K


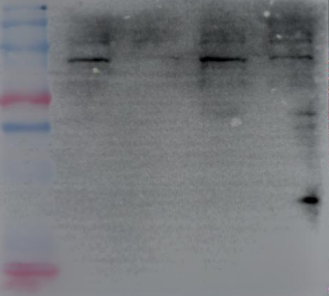
140

105

Phospho-PI3K 85kDa

70

55

40


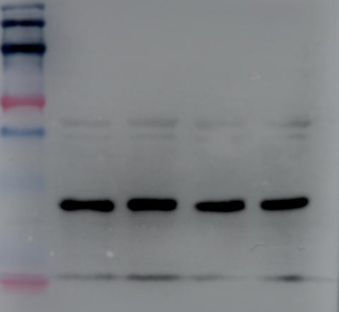


140

105

70

55

40

GAPDH 36kDa

28

10% SDS -PAGE

**Group:** marker siNC si PLAUR SC79 siPLAUR+SC79 Servicebio Marker Ⅶ（8-195kDa)

AKT


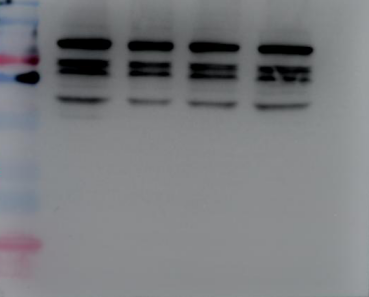


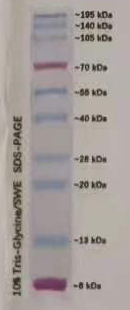
105

70

55 AKT 56 kDa

40

28


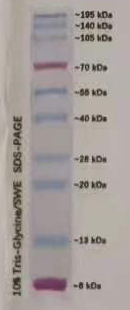


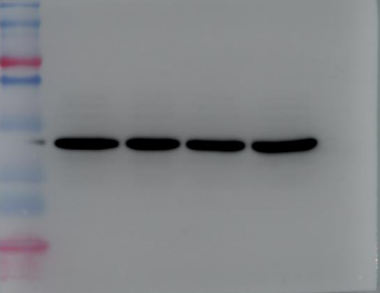


105

70

55

40

GAPDH 36kDa

28

20

10% SDS -PAGE

**Group:** marker siNC si PLAUR SC79 siPLAUR+SC79 Servicebio Marker Ⅶ（8-195kDa)

p-AKT


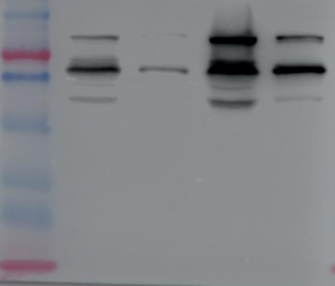


105

70

55 Phospho-AKT 56kDa

40

28


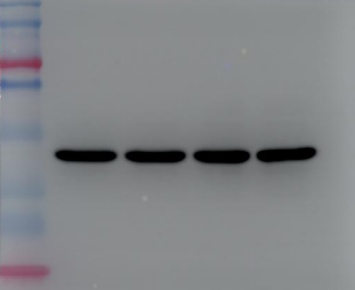


105

70

55

40

GAPDH 36kDa

28

20


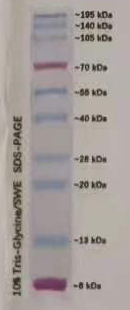
mTOR


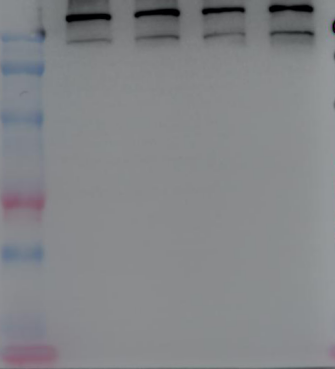
 mTOR 289kDa

195

140

105

70

55


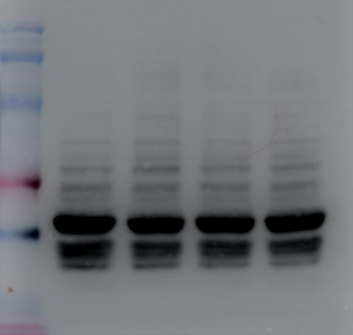


195

140

105

70

β-Tubulin 55kDa

55

7.5% SDS -PAGE

**Group:** marker siNC si PLAUR SC79 siPLAUR+SC79 Servicebio Marker Ⅶ（8-195kDa)

p-mTOR

320


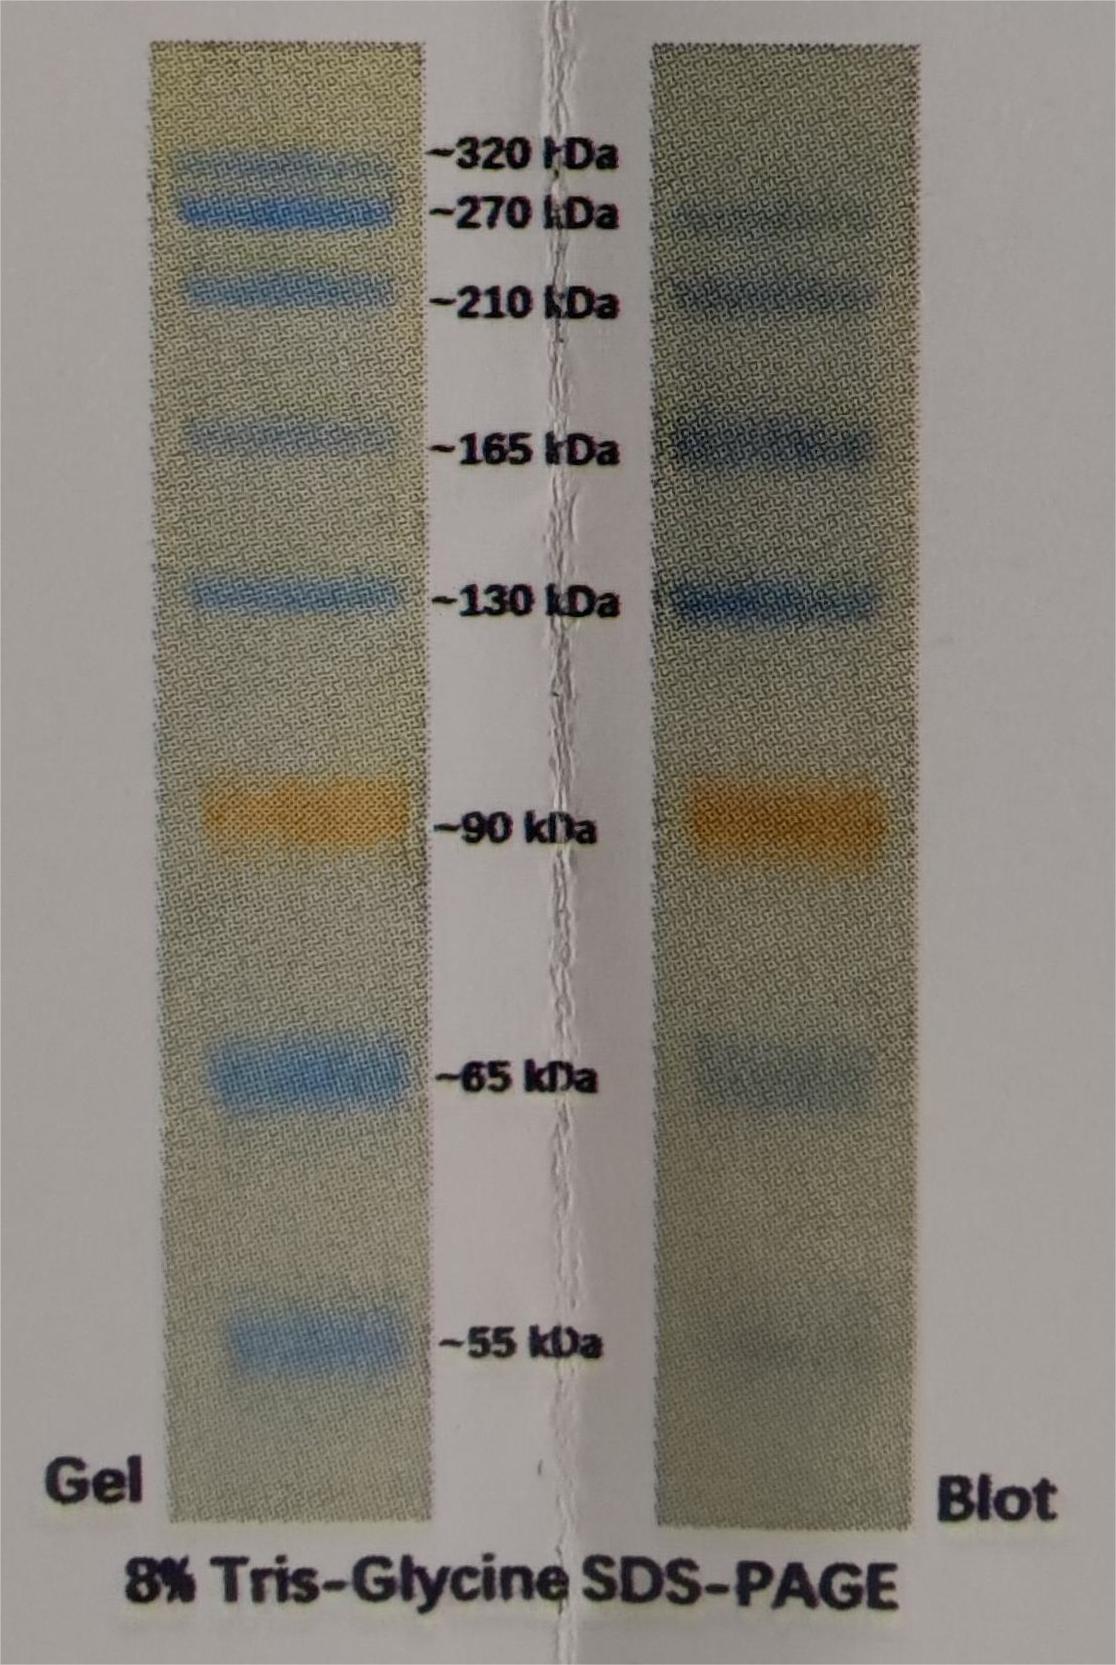

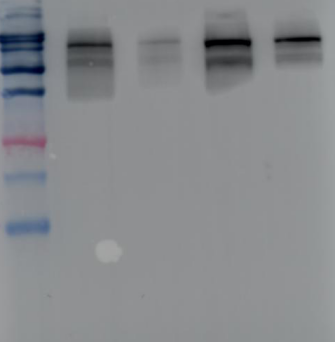
270

210 Phospho-mTOR 289kDa

165

130

90

65

55


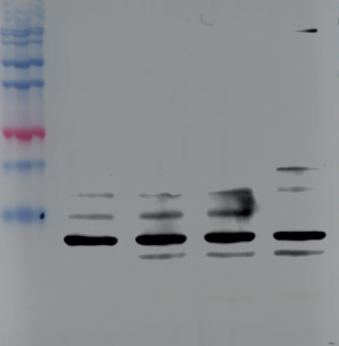


90

65

55

β-Tubulin 55kDa

7.5% SDS -PAGE

**Group:** marker siNC si PLAUR SC79 siPLAUR+SC79 Servicebio Marker Ⅶ（55-320kDa)

HIF-1α


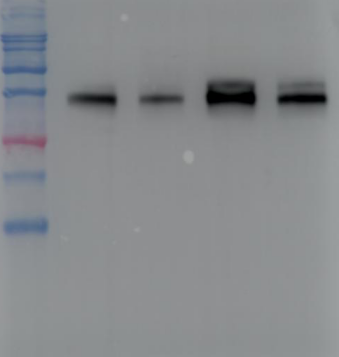

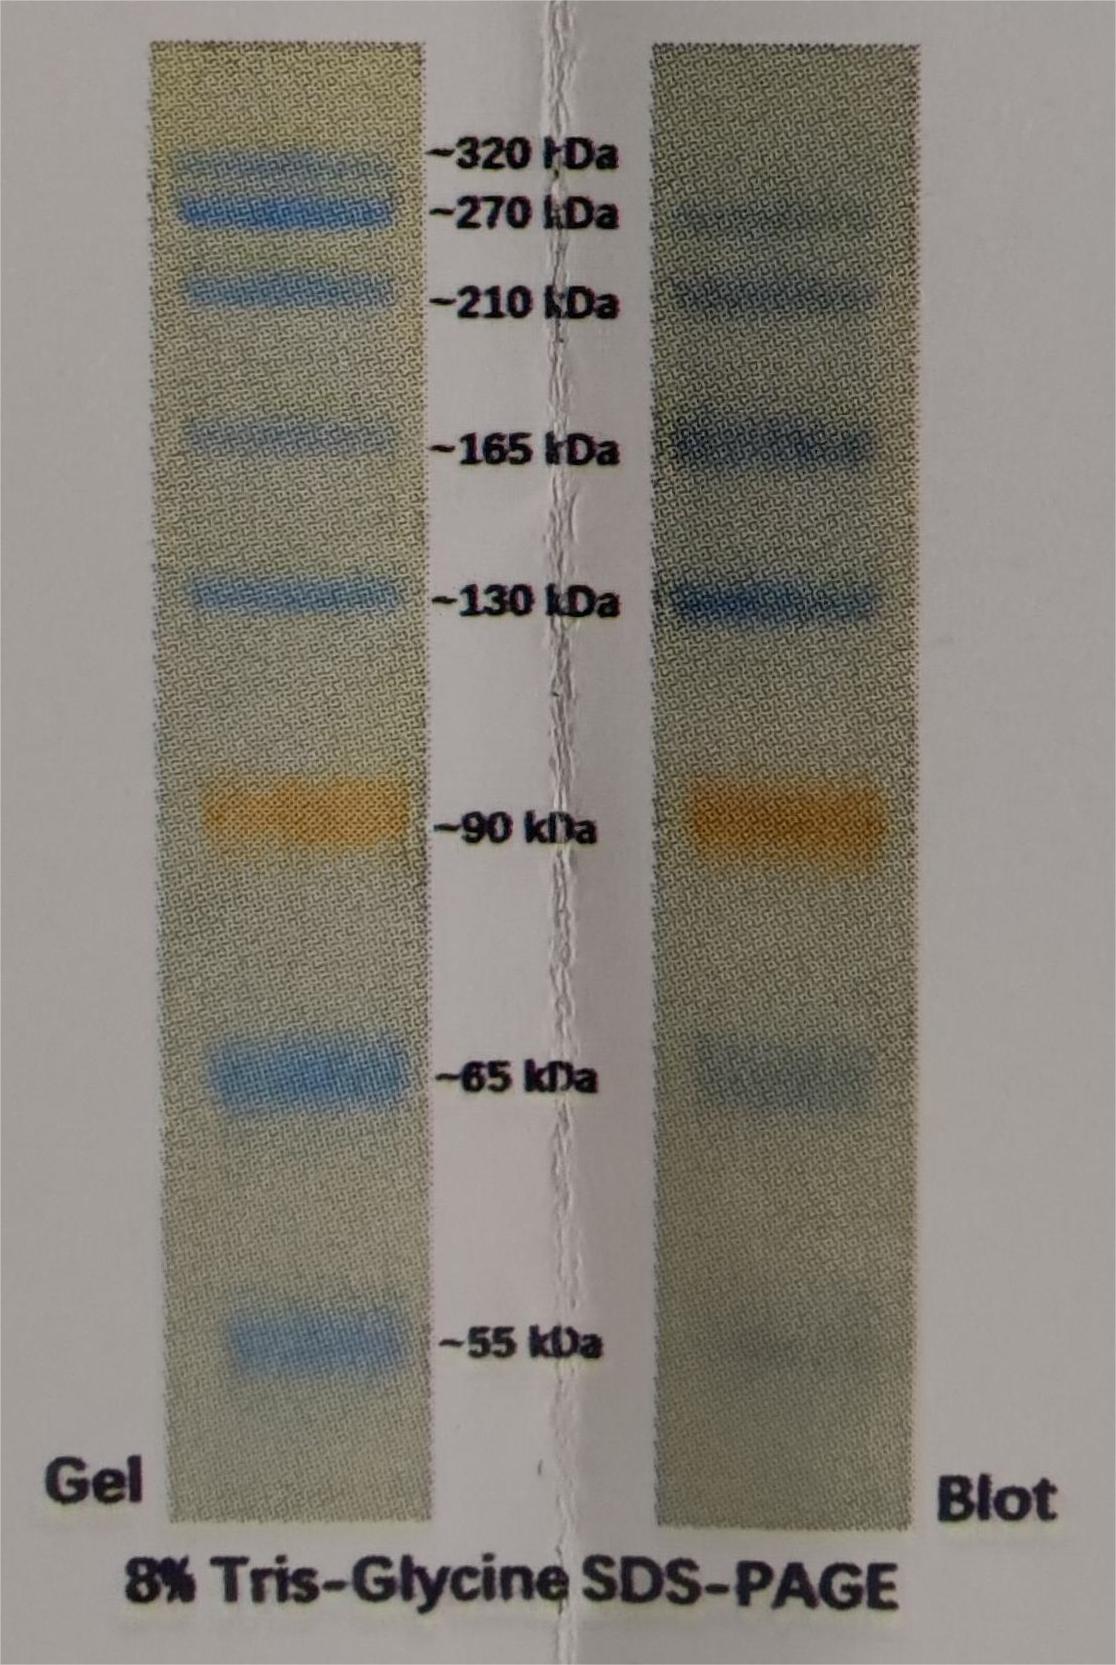


185

130

HIF-1α 120kDa

90

65

55


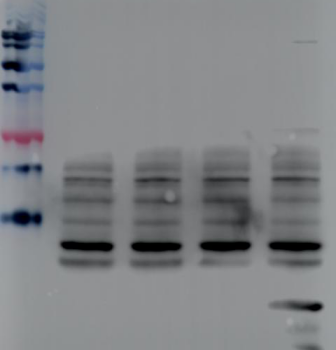


185

130

90

65

55

GAPDH 36kDa

7.5% SDS -PAGE

**Group:** marker siNC si PLAUR SC79 siPLAUR+SC79 Servicebio Marker Ⅶ（55-320kDa)
