# Supplementary figures and images for: PLAUR facilitates the progression of clear cell renal cell carcinoma by activating the PI3K/AKT/mTOR signaling pathway
Source: PeerJ journal article supplement (doi:10.7717/peerj.17555), 2024-06-27

# pi3k-akt-mTOR-HIF1 $\alpha$ -mmp9

- si NC
- siPLAUR
- SC79
- siPLAUR+SC79

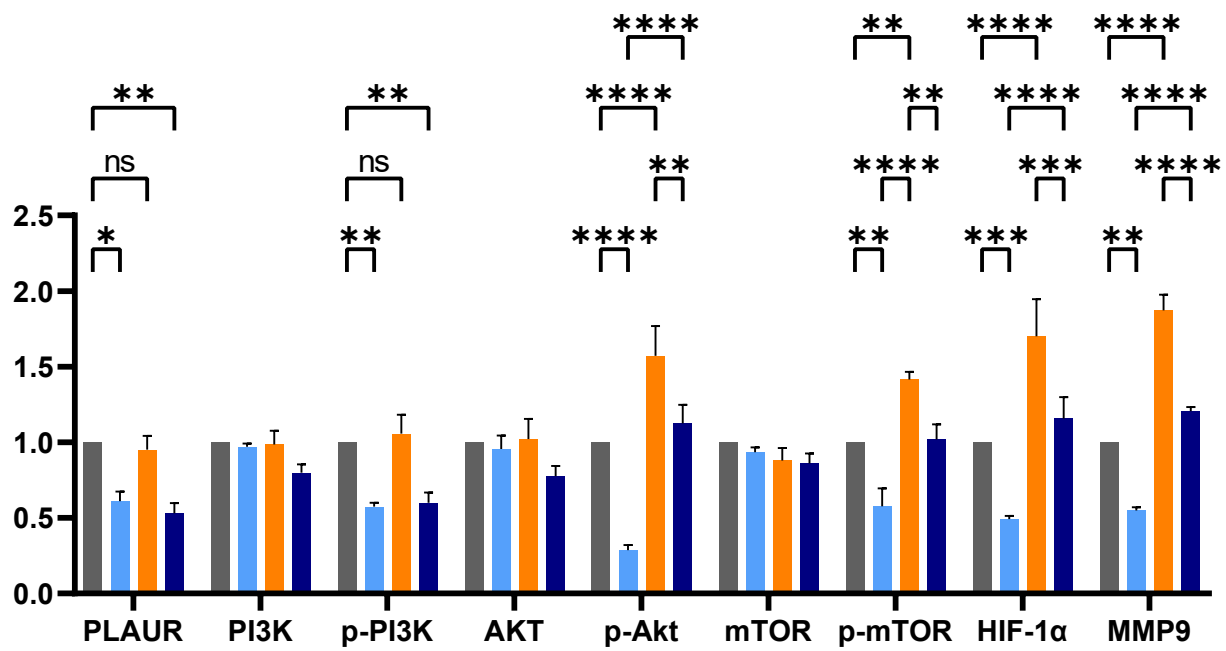

Supplement: Western_blot.zip [file Western_blot.zip]
